# Supplementary material
Source: publisher figshare collection journal article supplement (https://tandf.figshare.com/articles/dataset/_/5682856)
Supplement: Supplementary file 1 [file tmos_a_1396633_sm3504.pdf › tmos_a_1396633_sm3504.pdf]

**Supplementary Table 1.** List of specimens studied.

| Species                     | n. of specimens/collection    | locality                                                                        | Depth<br>(m)/ecological<br>notes                                         | Age for fossils          |
|-----------------------------|-------------------------------|---------------------------------------------------------------------------------|--------------------------------------------------------------------------|--------------------------|
| <i>Cerithium alucastrum</i> | 3 shs., coll. Garilli         | Valencia, Spain                                                                 | 12, on sand                                                              | Pliocene<br>(Piacenzian) |
|                             | 1 sh., MNHN coll. Vignal      | Llançà, Spain                                                                   | -                                                                        |                          |
|                             | 1 sh., MNHN coll. Locard      | Agde, France                                                                    | -                                                                        |                          |
|                             | 1 sh., MNHN                   | Banyuls sur Mer,<br>France                                                      | 5-10                                                                     |                          |
|                             | 2 shs., MNHN coll. Vignal     | Marseille, France                                                               | -                                                                        |                          |
|                             | 11 shs., (9 P), MNHN          | Marseille (Grand<br>Congloue),<br>France                                        | 33                                                                       |                          |
|                             | 1 sh., MNHN coll. Dautzenberg | Roussillon,<br>France                                                           | -                                                                        |                          |
|                             | 1 sh., MNHN coll., Locard     | La Ciotat, France                                                               | -                                                                        |                          |
|                             | France<br>27 P, MNHN Coll.    | Provence, (“Le<br>Dramont pied de<br>tombant”),                                 | 22–30                                                                    |                          |
|                             | 1 sh., MNHN coll. Vignal      | Gulf of Lyon,<br>France                                                         | -                                                                        |                          |
|                             | 6 shs., MNHN coll. Locard     | St. Henri, France                                                               | -                                                                        |                          |
|                             | 1 sh., MNHN coll. Locard      | Biguglia, Corsica                                                               | -                                                                        |                          |
|                             | 7 shs., SMNH 34559            | Baie de Calvi,<br>Corsica, 42°34' N<br>8°45' E.<br>Bouchet &<br>Warén, 1982-11. | 60–80, shell<br>debris and silt<br>mixed with<br><i>Posidonia</i> fibres |                          |
|                             | 1 sh., MNHN coll. Vignal      | Baie de Nora,<br>Sardinia                                                       | -                                                                        |                          |
|                             | 1 sh., MNHN coll. Vignal      | Sardinia                                                                        | -                                                                        |                          |
|                             | 2 shs., coll. Garilli         | Castell' Arquato                                                                | -                                                                        |                          |
|                             | 3 shs., MNHN coll. Vignal     | Venice, Italy                                                                   | -                                                                        |                          |
|                             | 2 shs., coll. Spada           | Between<br>Chioggia, Italy<br>and Rovigno,<br>Croatia                           | 30                                                                       |                          |
|                             | 2 sh., MNHN coll. Locard      | Chioggia, Italy                                                                 | -                                                                        |                          |
|                             | 3 shs., coll. Spada           | Ancona, Italy                                                                   | -                                                                        |                          |
|                             | 1 sh., MNHN coll. Locard      | Adriatic Sea                                                                    | -                                                                        |                          |

|   |                                                  |                                                                                                                         |                                      |                                     |
|---|--------------------------------------------------|-------------------------------------------------------------------------------------------------------------------------|--------------------------------------|-------------------------------------|
|   | 26 P, MGUP coll. Buccheri                        | Isle of Ponza,<br>Italy                                                                                                 | 72–74                                |                                     |
|   | 19 shs., MGUP                                    | Fondo Patti,<br>Palermo, Sicily                                                                                         | Infra-circalittoral                  | Early<br>Pleistocene<br>(Calabrian) |
| * | 4 shs., (1 P), coll. Garilli                     | Altavilla Milicia,<br>Palermo                                                                                           | Infra-circalittoral                  | Piacenzian–<br>Gelasian             |
|   | 19 shs., (7 P), coll. Garilli                    | Case<br>Catarinicchia,<br>Castelvetrano,<br>Italy                                                                       | Circalittoral                        | Early<br>Pleistocene<br>(Calabrian) |
|   | 44 shs., (2 P), coll. Garilli                    | Case Parrino,<br>Castelvetrano,<br>Italy                                                                                | Circalittoral                        | Early<br>Pleistocene<br>(Calabrian) |
|   | 49 shs., (9 P), coll. Garilli                    | Monte dell’Apa,<br>Gela, Italy                                                                                          | Circalittoral                        | Early<br>Pleistocene<br>(Calabrian) |
|   | 2 P, coll. Garilli                               | Scopello, Trapani,<br>Sicily                                                                                            | 12                                   |                                     |
|   | 4 P, coll. Garilli                               | Cinisi, Palermo,<br>Sicily                                                                                              | Beached shells                       |                                     |
|   | 4 sh., coll. Ricordi                             | Isola delle<br>Femmine,<br>Palermo, Italy                                                                               | 60–80                                |                                     |
|   | 2 shs., MNHN coll. Vignal                        | Palermo, Italy                                                                                                          | -                                    |                                     |
|   | 1 sh., MNHN coll. Fisher ex<br>coll. Monterosato | Palermo, Italy                                                                                                          | -                                    |                                     |
| * | 35 shs., coll. Garilli                           | Oued<br>el Galaa (“stop<br>2”), Menzel<br>Bourguiba,<br>Tunisia                                                         | Infralittoral sands,<br>open sea     | Late Zanclean–<br>Piacenzian        |
|   | 5 shs., MNHN coll. Pallary                       | Sfax, Tunisia                                                                                                           | -                                    |                                     |
|   | 1 sh., coll Garilli                              | Monastir-Khenis                                                                                                         | Infra-circalittoral                  | Late Pleistocene                    |
|   | 1sh., SMNH 19335                                 | Off Acicastello,<br>Sicily, 37°33’ N<br>15°10’ E. Mission<br>Sicile Orientale,<br>1990. Sta.0106.                       | 60–80, silt with<br>scattered rocks. |                                     |
|   | 9 shs., SMNH 19163                               | Isola Lachea,<br>Acitrezza, Sicily<br>32-38 m. 37°33’<br>N 15°11’ E.<br>Mission Sicile<br>Orientale, 1990.<br>Sta. 0099 | 32–38, rocky<br>slopes               |                                     |
|   | 14 shs., SMNH 19164                              | Capo Mulini,                                                                                                            | 23–41, rocky                         |                                     |

|                             |                                          |                                                                                                                |                                                             |                      |
|-----------------------------|------------------------------------------|----------------------------------------------------------------------------------------------------------------|-------------------------------------------------------------|----------------------|
|                             |                                          | Acitrezza, Sicily,<br>23-41 m. 37°34'N<br>15°11' E. Mission<br>Sicile Orientale,<br>1990. Sta. 0100            | slopes                                                      |                      |
|                             | 2 shs., SMNH 19112                       | Baie de Brucoli,<br>Sicily, 37°16' N<br>15° 11' E.<br>Mission Sicile<br>Orientale, 1990.<br>Sta. 0114          | 3-9, <i>Posidonia</i><br>and sand                           |                      |
|                             | 3 shs., SMNH 19107                       | Cozzo dei Turchi,<br>Brucoli, Sicily,<br>37°17' N 15°09'<br>E. Mission Sicile<br>Orientale, 1990.<br>Sta. 0118 | 20, algae, stones<br>and<br><i>Lithothamnium</i><br>gravel. |                      |
|                             | 1 P, MNHN                                | Marathon, Greece                                                                                               | Infralittoral                                               |                      |
|                             | 2 P, MNHN                                | Isle of Spetses,<br>Greece                                                                                     | Beached shells                                              |                      |
|                             | 2 shs., MNHN coll. D'Orbigny -<br>B41320 | Isle of Rhodos                                                                                                 | -                                                           | Early<br>Pleistocene |
| <i>Cerithium protractum</i> | 1 sh., MNHN, coll. Gofas                 | Torrox, Malaga,<br>Spain                                                                                       | 20-40                                                       |                      |
|                             | 7 shs., MNHN, coll. Gofas                | Malaga, Spain                                                                                                  | 20-40                                                       |                      |
|                             | 13 shs., MNHN, coll. Gofas               | Rincon de la<br>Victoria, Malaga,<br>Spain                                                                     | 20-40                                                       |                      |
|                             | 3 shs., MNHN coll. Locard                | Agde, France                                                                                                   | -                                                           |                      |
|                             | 7 shs., MNHN coll. Locard                | Biguglia, Corsica                                                                                              | -                                                           |                      |
|                             | 3 shs., MNHN coll. P. Noel               | Banyuls sur Mer,<br>France, Herbiere<br>du Racou<br><br>42°32,5'N-<br>3°04'E                                   | 5-10, bottom with<br>vegetation                             |                      |
|                             | 1 sh., MNHN coll. Locard                 | Cannes, France                                                                                                 | -                                                           |                      |
|                             | 2 shs., MNHN coll. Locard                | Cete, France                                                                                                   | -                                                           |                      |
|                             | 3 shs., MNHN coll. Gofas                 | Le Brusca-Cap<br>Siciè                                                                                         | 10-30, <i>Posidonia</i>                                     |                      |
|                             | 5 shs., MNHN coll. Locard                | Marseille, France                                                                                              | -                                                           |                      |
|                             | 1 sh., MNHN Coll. Denis                  | Toulon, France                                                                                                 | -                                                           |                      |
|                             | 1 sh., Coll. Locard                      | Toulon, France                                                                                                 | -                                                           |                      |
|                             | 1 sh., MNHN coll. Locard                 | La<br>Seyne/Algajola,<br>France/Corsica                                                                        | -                                                           |                      |
|                             | 2 shs., MNHN coll. Locard                | St. Florence,<br>Corsica                                                                                       | -                                                           |                      |
|                             | 1 sh., MNHN coll. Locard                 | St. Raphael,<br>France                                                                                         | -                                                           |                      |

|                           |                                                             |                                                                       |                                   |
|---------------------------|-------------------------------------------------------------|-----------------------------------------------------------------------|-----------------------------------|
|                           | 1 sh., MNHN                                                 | Bay of Brucoli,<br>SE Sicily,<br>Mission Sicile<br>Orientale, 1990    | 3–9, <i>Posidonia</i><br>and sand |
|                           | 1 sh., MNHN coll. Vignal                                    | Preveza, Ionian<br>Greece                                             | -                                 |
| <i>Cerithium repandum</i> | 2 shs., MNHN coll. Locard                                   | Hyères, France                                                        | -                                 |
|                           | 68 P, MNHN                                                  | Embiez est,<br>France                                                 |                                   |
|                           | 3 shs., MNHN coll Locard                                    | Agde, France                                                          | -                                 |
|                           | 3 shs., MNHN coll. Locard                                   | Bandol, France                                                        | -                                 |
|                           | 6 shs., MNHN coll. Locard                                   | Cannes, France                                                        | -                                 |
|                           | 9 shs., MNHN coll. Locard                                   | Sète, France                                                          | -                                 |
|                           | 1 sh., MNHN coll. Vignal                                    | Cap d'Agde,<br>France                                                 | -                                 |
|                           | 5 shs., MNHN coll Locard                                    | Cap Sicié, France                                                     |                                   |
|                           | 68 shs., MNHN                                               | Embiez, France                                                        | -                                 |
|                           | 97 shs., MNHN coll. Clanzig<br>(pars)                       | Languedoc-<br>Roussillon<br>(L'étang de<br>Salses-Leucate),<br>France | Lagoon                            |
|                           | 52 (42 P) shs., MNHN coll.<br>Gofas                         | Languedoc-<br>Roussillon<br>(L'étang de<br>Salses-Leucate),<br>France | 0–1 lagoon                        |
|                           | 5 shs., MNHN coll. Locard                                   | La Seyne, France                                                      |                                   |
|                           | 289 shs., (109), MNHN                                       | Le Brusc<br>("Lagune,<br>herbiers du<br>Brusc"), France               | 0–1 lagoon                        |
|                           | 2 shs., MNHN coll. Locard                                   | Marseille, France                                                     | -                                 |
|                           | 3 shs., MNHN coll. Locard                                   | Martigues, France                                                     | -                                 |
|                           | 2 shs., MNHN coll. Locard                                   | Menton, France                                                        | -                                 |
|                           | 9 shs., MNHN coll. Locard                                   | Nice, France                                                          | -                                 |
|                           | 172 shs., (59 P), MNHN also<br>from coll. Locard and Vignal | Porquerolles,<br>France                                               | 0–1 (pars)                        |
|                           | 12 shs., MNHN coll. Locard                                  | "Rade de<br>Toulon", France                                           |                                   |
|                           | 2 shs., MNHN coll Locard                                    | Roussillon,<br>France                                                 | -                                 |
|                           | 93 P, MNHN                                                  | St. Clair, France                                                     | 0–1                               |
|                           | 8 shs., MNHN coll. Locard                                   | St. Raphael,<br>France                                                | -                                 |
|                           | 5 shs., MNHN coll. Locard                                   | St. Tropez,<br>France                                                 | -                                 |
|                           | 2 shs., MNHN coll. Vignal                                   | La Spezia, Italy                                                      | -                                 |
|                           | 4 shs., MNHN coll. Locard                                   | St. Florent,                                                          | -                                 |

|                                                   |                                                     |                                           |                               |
|---------------------------------------------------|-----------------------------------------------------|-------------------------------------------|-------------------------------|
|                                                   | Corsica                                             |                                           |                               |
| 7 shs., MNHN coll. Vignal                         | Stagno di Diana, Corsica                            | Lagoon                                    |                               |
| 6 shs., MNHN coll. Locard                         | Bastia, Corsica                                     | -                                         |                               |
| 12 shs., MNHN coll. Vignal                        | Bastia, Corsica                                     | -                                         |                               |
| 3 shs., MNHN coll. Locard                         | Bonifacio, Corsica                                  | -                                         |                               |
| 1 sh., MNHN coll. Locard                          | Calvi, Corsica                                      | -                                         |                               |
| 13 shs., MNHN coll C. and F. Monniot              | Folaca, Corsica                                     | Mediolittoral                             |                               |
| 30 shs., SMNH 34554                               | 4 km E of Porto Vecchio, Corsica, 41°35' N 9°17' E. | 2, Algal washing                          |                               |
| 2 shs., MNHN coll. Locard                         | Rousse Island, Corsica                              | -                                         |                               |
| 12 shs., (11 P), MNHN                             | Porto Vecchio, Corsica                              | -                                         |                               |
| 9 shs., MNHN coll. Locard                         | Ajaccio, Corsica                                    | -                                         |                               |
| 2 shs., MNHN coll. Vignal                         | “Gulf of Bonaria”, Sardinia                         | -                                         |                               |
| 52 shs., coll. Garilli                            | Pietrafitta, “La Vigna”, Siena, Italy               | Infralittoral sands                       | Pliocene (Piacenzian)         |
| 7 shs., coll Garilli                              | Pietrafitta, “Podere”, Siena, Italy                 | Infralittoral sands                       | Pliocene (Piacenzian)         |
| 10 shs., coll. Toscano                            | Lago Miseno, Italy                                  | Brackish lake                             |                               |
| 6 shs., MNHN coll. Vignal                         | Naples, Italy                                       | -                                         |                               |
| 9 shs., MNHN coll. Vignal                         | Cuma, Italy                                         | -                                         |                               |
| 5 shs., MNHN coll. Vignal                         | Isle of Capri, Italy                                | -                                         |                               |
| 1 sh., coll Spada                                 | Porto Cesareo, Italy                                | 3–6                                       |                               |
| 536 shs., (201 P), coll Garilli, also at MNHN     | Stagnone di Marsala, Sicily                         | 0–0.2 lagoon                              |                               |
| 106 shs., (21 P), MGUP coll. Buccheri             | Isola Grande, Sicily                                | Lagoon                                    |                               |
| 1 sh., MNHN coll. H. Fischer ex coll. Monterosato | Trapani, Sicily                                     | -                                         |                               |
| 19 shs., (12 P), coll Garilli                     | Favignana island, off Sicily                        | Beach deposit                             |                               |
| 128 shs., (27 P), coll Garilli, also at MNHN      | San Vito lo Capo, Sicily                            | 0.5–3                                     |                               |
| 105 shs., (42 P), coll Garilli                    | Dattilo, Trapani, Sicily                            | <i>Posidonia</i> in sheltered environment | Early Pleistocene (Calabrian) |
| 9 P, MNHN coll. Garilli                           | Cinisi, Sicily                                      | Beach deposit                             |                               |

|                                                   |                                                                                                             |                                                  |                                     |
|---------------------------------------------------|-------------------------------------------------------------------------------------------------------------|--------------------------------------------------|-------------------------------------|
| 11 P, coll Garilli                                | Capo Gallo,<br>Palermo, Sicily                                                                              | 16–20 <i>Posidonia</i><br>and sand               |                                     |
| 23 P, coll. Garilli, also at<br>MNHN              | Mondello, Sicily                                                                                            | 0.1–1 algae and<br>sand                          |                                     |
| 6 shs., MNHN coll. Vignal                         | Palermo, Sicily                                                                                             | -                                                |                                     |
| 13 shs., MNHN coll. Locard                        | Palermo, Sicily                                                                                             | -                                                |                                     |
| 3 P, coll. Garilli                                | Palermo, Sicily                                                                                             | Sand from<br>palaeo <i>Posidonia</i><br>bed      | Holocene                            |
| 112 shs., (1 P), coll. Garilli                    | Palermo (Fondo<br>Patti), Sicily                                                                            | Infra–circalittoral                              | Early<br>Pleistocene<br>(Calabrian) |
| 3 shs., MNHN coll. Vignal                         | Milazzo, Sicily                                                                                             | -                                                |                                     |
| 1274 shs., (536 P), coll Garilli,<br>also at MNHN | Tindari, Sicily                                                                                             | Brackish lakes                                   |                                     |
| 10 shs., MNHN coll Vignal                         | Messina, Sicily                                                                                             | -                                                |                                     |
| 10 shs., MNHN coll Vignal                         | Messina, Sicily,<br>and Sfax, Tunisia                                                                       | -                                                |                                     |
| 1 sh., coll. Garilli                              | Messina, Sicily                                                                                             | 0.5 lagoon                                       |                                     |
| 2 shs., MNHN coll. Locard                         | Messina, Sicily                                                                                             | -                                                |                                     |
| 8 shs., (7 P), MNHN coll Garilli                  | Torre Vendicari,<br>Sicily                                                                                  | 0.2–0.6 algae                                    |                                     |
| 34 shs., (8 P), coll. Garilli                     | Cartiera Mulino,<br>Vittoria, Ragusa,<br>Sicily                                                             | <i>Posidonia</i> in<br>sheltered<br>environment  | Early<br>Pleistocene<br>(Calabrian) |
| 49 P, coll Garilli                                | Case Buffa,<br>Vittoria, Ragusa,<br>Sicily                                                                  | Sheltered,<br>possibly lagoon<br>environment     | Early<br>Pleistocene<br>(Calabrian) |
| 1 sh., SMNH 18805                                 | Brucoli, Sicily, 1–<br>2 m. 37°16' N 15°<br>11' E. Mission<br>Sicile Orientale,<br>1990. Sta. 0113          | 1–2, stones, algae<br>and sea grass.             |                                     |
| 12 shs., SMNH 18865                               | Baie de Brucoli,<br>Punta Tonnara,<br>37°17' N 15°11' E.<br>Mission Sicile<br>Orientale, 1990.<br>Sta. 0111 | 0–2, rocks and<br>algae                          |                                     |
| 3 shs., SMNH 19112                                | Baie de Brucoli,<br>Sicily, 37°16' N<br>15° 11' E.<br>Mission Sicile<br>Orientale, 1990.<br>Sta. 0114       | 3–9, <i>Posidonia</i><br>and sand                |                                     |
| 172 shs., SMNH 19110                              | Baie de Brucoli,<br>Sicily, 37° 16' N<br>15°11' E. Mission<br>Sicile Orientale,<br>1990. Sta. 0110          | Seagrass beds                                    |                                     |
| 3 shs., SMNH 19107                                | Cozzo dei Turchi,<br>Brucoli, Sicily,<br>37°17' N 15°09'                                                    | 20, algae, stones<br>and<br><i>Lithothamnium</i> |                                     |

|                                            |                                                     |                                      |                          |
|--------------------------------------------|-----------------------------------------------------|--------------------------------------|--------------------------|
|                                            | E. Mission Sicile Orientale, 1990. Sta. 0118        | gravel.                              |                          |
| 15 shs., coll. Garilli                     | Harbour of Linosa island, Strait of Sicily          | 0.5–1, on sands and rocks with algae |                          |
| 6 shs., MNHN coll. Vignal                  | El Kantara, Algeria                                 | -                                    |                          |
| 654 shs., (113 P), coll. Garilli           | Oued El Galaa (“stop 2”), Menzel Bourguiba, Tunisia | Lagoon mud and sand                  | Late Zanclean–Piacenzian |
| 107 shs., (37 P), coll. Garilli            | Oued El Galaa (“stop 1”), Menzel Bourguiba, Tunisia | Infralittoral sands, open sea        | Late Zanclean–Piacenzian |
| 5 shs., MNHN coll. Vignal                  | “Chenal de Tunis”, Tunisi, Tunisia                  | Lagoon                               |                          |
| 5 shs., MNHN coll. Vignal                  | “Lac de Tunis”, Tunisi, Tunisia                     | Lagoon/lake                          |                          |
| 153 shs., (58 P), coll. Garilli            | La Goulette, Tunisia                                | 0–0.5 lagoon/lake, sand and mud      |                          |
| 221 shs., (46 P), MNHN coll Garilli        | Between Monastir and Khenis, Tunisia                | 0–0.5, on sands, open sea            |                          |
| 299 shs., (75), MNHN coll Garilli          | Between Monastir and Khenis, Tunisia                | 0–0.5 mud and sand, lagoon           |                          |
| 43 shs., coll. Garilli                     | Between Monastir and Khenis, Tunisia                | Infra–circalittoral                  | Late Pleistocene         |
| 10 shs., coll Pallary and Vignal           | Sfax, Tunisia                                       | -                                    |                          |
| 19 shs., MNHN coll. Dautzenberg and Vignal | Gulf of Gabès, Tunisia                              | -                                    |                          |
| 4 shs., MNHN coll. Pallary                 | Adjim, Djerba Tunisia                               | -                                    |                          |
| 23 shs., MNHN coll. Pallary and Vignal     | Djerba, Tunisia                                     |                                      |                          |
| 36 shs., (24 P), MNHN coll. Boisselier     | Borj Jlij, Djerba, Tunisia                          | Infralittoral                        |                          |
| 134 shs., (68 P), MNHN coll. Boisselier    | Boughrara Sea, Djerba, Tunisia                      | Mud and sand, lagoon                 |                          |
| 644 shs., (364 P), MNHN coll. Boisselier   | El Quantara, Djerba, Tunisia                        | Lagoon                               |                          |
| 59 shs., MNHN coll. Boisselier             | La Fidel, Djerba, Tunisia                           | Lagoon                               |                          |
| 3 shs., MNHN coll. Boisselier              | La Fidel, Djerba, Tunisia                           | Infralittoral, open sea              |                          |

|                           |                                          |                                                                                             |                                         |
|---------------------------|------------------------------------------|---------------------------------------------------------------------------------------------|-----------------------------------------|
|                           | 211 shs., (117 P), MNHN coll. Boisselier | Northern coast of Djerba, Tunisia                                                           | Sheltered infralittoral                 |
|                           | 267 shs., (226 P), MNHN coll. Boisselier | Northeastern coast of Djerba, Tunisia                                                       | Lagoon                                  |
|                           | 97 P, MNHN coll. Boisselier              | Northeastern coast of Djerba, Tunisia                                                       | Infralittoral, open sea                 |
|                           | 6 shs., MNHN also coll. Vignal           | “Coste di Barberia”, North Africa                                                           | -                                       |
|                           | 2 shs., MNHN coll. Vignal                | “Tripolitaine”, Libya                                                                       | -                                       |
|                           | 3 shs., MNHN coll. Vignal                | Tripoli, Libya                                                                              | -                                       |
|                           | 2 shs., coll. Spada                      | Isle of Agios Sostis, Zakynthos, Greece                                                     | 0–2                                     |
|                           | 16 shs., coll. Spada                     | Coral Bay, Pafos, Isle of Cyprus                                                            | 1–4                                     |
|                           | 114 shs., coll. Spada                    | Aya Napa, Isle of Cyprus                                                                    | 0.6–3                                   |
| <i>Cerithium vulgatum</i> | 3 shs., MNHN coll. Adanson               | Senegal                                                                                     | -                                       |
|                           | 118 P, MNHN                              | Temara, Atlantic Morocco                                                                    | 0-2                                     |
|                           | 30 shs., MNHN and 6 shs, SMNH 18860      | Algarve (Chenal d’Olhão Channel, Algarve, Portugal 37°00’ N 7°51’ W. Mission Algarve, 1988. | 3–7, soft bottoms and <i>Zoostera</i> . |
|                           | 571 shs., SMNH 18828, 18857              | Sagres Harbour, Algarve, Portugal. 37°00’ N 8°55’ W. Mission Algarve, 1988                  | 3–5, rocks and algae                    |
|                           | 1 sh., SMNH 18859                        | Sagres Harbour, Algarve, Portugal. 37°00’ N 8°55’ W. Mission Algarve, 1988                  | 9–15, rocks and algae                   |
|                           | 1 sh., SMNH 34562                        | Anse Almadraba, Ceuta, Strait of Gibraltar, 35°55’ N 5°19’ W. CEUTA 1986                    | 26–45                                   |
|                           | 3 shs., SMNH 34563                       | El Pineo, Ceuta, Strait of Gibraltar. 9-10 m. 35°52’ N 5°19’ W. P. Bouchet, May 1986        | 9–10                                    |
|                           | 14 shs., SMNH 34564                      | Punta del Saudino, Ceuta, Strait of Gibraltar, 35°54’ N 5°18’ W.                            | 20–40                                   |



|                                   |                                                                                                                                 |                                                   |
|-----------------------------------|---------------------------------------------------------------------------------------------------------------------------------|---------------------------------------------------|
| 4 shs., SMNH 34565                | CEUTA 1986<br>Punta del<br>Desmarigado,<br>Ceuta, Strait of<br>Gibraltar, 35°53'<br>N 5°16' W.                                  | 16–25                                             |
| 3 shs., SMNH 34566                | CEUTA 1986<br>San Amaro,<br>Ceuta, Strait of<br>Gibraltar, 35°53'<br>N 5°18' W.                                                 | 6                                                 |
| 4 shs., SMNH 18858                | CEUTA 1986<br>Portugal algarve,<br>Olhao E of<br>harbour. Algarve,<br>Portugal, 37°01'<br>N 7°49'W.<br>Mission Algarve,<br>1988 | Intertidal, muddy<br>sand, <i>Zoostera</i><br>bed |
| 12 shs., MNHN                     | Ceuta (harbour),<br>Spanish Morocco                                                                                             | 2–6                                               |
| 4 shs. (3 P), MNHN                | La Herradura,<br>Spain                                                                                                          | 3–10                                              |
| 3 shs., MNHN coll. Vignal         | Spain                                                                                                                           | -                                                 |
| 1 sh., MNHN coll. Vignal          | Palma de<br>Mallorca,<br>Balearic Islands                                                                                       | -                                                 |
| 1 sh., MNHN coll. Vignal          | “Baie de Soller”,<br>Mallorca,<br>Balearic Islands                                                                              | -                                                 |
| 5 shs., MNHN coll. Locard         | Cannes, France                                                                                                                  | -                                                 |
| 1 sh., MNHN coll. Vignal          | Sète, France                                                                                                                    | -                                                 |
| 1 sh., MNHN coll. Locard          | La Seyne, France                                                                                                                | -                                                 |
| 1 sh., MNHN coll. Locard          | Marseille, France                                                                                                               | -                                                 |
| 1 sh., MNHN coll. Vignal          | Martigues, France                                                                                                               | -                                                 |
| 3 shs., MNHN coll.<br>Dautzenberg | Roussillon,<br>France                                                                                                           | -                                                 |
| 18 P, MNHN                        | St. Clair, France                                                                                                               | -                                                 |
| 4 shs., MNHN coll. Locard         | St. Raphael,<br>France                                                                                                          | -                                                 |
| 1 sh., MNHN coll. Locard          | St. Tropez,<br>France                                                                                                           | -                                                 |
| 1 sh., MNHN coll. Vignal          | Antibes, France                                                                                                                 | -                                                 |
| 1 sh., MNHN coll. Vignal          | La Spezia, Italy                                                                                                                | -                                                 |
| 1 sh., SMNH 36314                 | Porto Venere, La<br>Spezia, Leg.<br>Schuller,<br>26/1/1932<br>Ex Coll.<br>Schlesch.                                             | -                                                 |
| 4 shs., MNHN coll. Vignal         | Bastia, Corsica                                                                                                                 | -                                                 |
| 2 shs., MNHN coll. Locard         | St. Florent,                                                                                                                    | -                                                 |

|                                               |                                                |                                                                        |                                     |
|-----------------------------------------------|------------------------------------------------|------------------------------------------------------------------------|-------------------------------------|
|                                               | Corsica                                        |                                                                        |                                     |
| 4 shs., MNHN coll. Vignal                     | Naples, Italy                                  | -                                                                      |                                     |
| 7 shs., coll. Spada                           | Punta Pennata,<br>Naples, Italy                | 15                                                                     |                                     |
| 165 shs. (5 P), coll Garilli, also<br>at MNHN | San Vito Lo<br>Capo, Trapani,<br>Sicily        | 0.5–3                                                                  |                                     |
| 21 shs., coll. Garilli                        | Castellammare,<br>Trapani, Sicily              | 2–4, on rocks with<br>algae                                            |                                     |
| 65 shs., (3 P), coll. Garilli                 | Cinisi, Palermo,<br>Sicily                     | Beached shells                                                         |                                     |
| 14 shs., (3 P), coll Garilli, also<br>at MNHN | Capo Gallo,<br>Palermo, Sicily                 | 16–20 on fine<br>gravel and coarse<br>sand between<br><i>Posidonia</i> |                                     |
| 6 shs., coll Garilli                          | Capo Gallo,<br>Palermo, Sicily                 | 1.5–2 on<br>photophilous<br>algae                                      |                                     |
| 24 shs., (5P), coll. Garilli                  | Mondello,<br>Palermo, Sicily                   | 0.1–1 on<br>photophilous<br>algae                                      |                                     |
| 41 P, MGUP                                    | Fondo Patti,<br>Palermo, Sicily                | Infra–circalittoral                                                    | Early<br>Pleistocene<br>(Calabrian) |
| 14 shs. MNHN coll. Vignal                     | Palermo, Sicily                                |                                                                        |                                     |
| 55 shs. (33 P), coll. Garilli                 | Palermo, Sicily                                | Sand from<br>palaeo <i>Posidonia</i><br>bed                            | Holocene                            |
| 15 shs. (10 P), coll. Garilli                 | Tommaso Natale,<br>Palermo, Sicily             | Infralittoral                                                          | Late Pleistocene                    |
| 1 sh., MNHN coll. Vignal                      | Algeri, Algeria                                | -                                                                      |                                     |
| 2 shs., MNHN coll. Vignal                     | Arzew, Algeria                                 | -                                                                      |                                     |
| 1 sh., MNHN coll. Locard                      | Oran, Algeria                                  | -                                                                      |                                     |
| 2 shs., MNHN coll. Vignal                     | Adjim, Tunisia                                 | -                                                                      |                                     |
| 2 shs., MNHN coll. Pallary                    | Tunisi, Tunisia                                | -                                                                      |                                     |
| 4 P, MNHN coll Garilli                        | Between Monastir<br>and Khenis,<br>Tunisia     | 0–0.5 on sands,<br>open sea                                            |                                     |
| 62 shs., coll. Garilli                        | Between Monastir<br>and Khenis,<br>Tunisia     | Infra–circalittoral                                                    | Late Pleistocene                    |
| 6 shs., MNHN coll. Pallary                    | Sfax, Tunisia                                  | -                                                                      |                                     |
| 6 shs., MNHN coll. Vignal                     | Djerba, Tunisia                                | -                                                                      |                                     |
| 9 shs. (8 P), MNHN coll.<br>Boisselier        | Northeast Djerba<br>Island, lagoon,<br>Tunisia | -                                                                      |                                     |
| 7 shs., MNHN coll. Boisselier                 | Northeast Djerba<br>Island, open sea,          | -                                                                      |                                     |

|                               |                                                                                                                |                                                             |                                     |
|-------------------------------|----------------------------------------------------------------------------------------------------------------|-------------------------------------------------------------|-------------------------------------|
|                               | Tunisia                                                                                                        |                                                             |                                     |
| 1 sh., MNHN coll. Vignal      | “Tripolitaine”,<br>Lbya                                                                                        | -                                                           |                                     |
| 1 sh., MNHN coll. Vignal      | Benghazi, Libya                                                                                                | -                                                           |                                     |
| 6 shs., coll. Spada           | Duino, Trieste,<br>Italy                                                                                       | 4–5                                                         |                                     |
| 5 shs., coll. Spada           | Venice, Italy                                                                                                  |                                                             |                                     |
| 8 shs., coll. Garilli         | Grado, Gorizia,<br>Italy                                                                                       | photophilous<br>algae                                       |                                     |
| 2 shs., MNHN coll. Vignal     | Isle of Corfu,<br>Greece                                                                                       | -                                                           |                                     |
| 6 shs., coll. Spada           | Porto Cesareo,<br>Lecce, Italy                                                                                 | 3–6                                                         |                                     |
| 18 shs. (18 P), coll. Spada   | Isle of Agios<br>Sostis, Zakynthos,<br>Greece                                                                  | 0–2                                                         |                                     |
| 23 shs. (15 P), coll. Garilli | Kyllini, Greece                                                                                                | Infralittoral                                               | Late Pleistocene                    |
| 1 sh., SMNH 18862             | Acitrezza, Sicily,<br>0–5 m. 37°33'N<br>15°10'E<br>Mission Sicile<br>Orientale, 1990.<br>Sta. 0103             | 0–5, algae and<br>coralline gravel                          |                                     |
| 5 shs., SMNH 19112            | Baie de Brucoli,<br>Sicily, 37°16' N<br>15° 11' E.<br>Mission Sicile<br>Orientale, 1990.<br>Sta. 0114          | 3–9, <i>Posidonia</i><br>and sand                           |                                     |
| 3 shs., SMNH 19107            | Cozzo dei Turchi,<br>Brucoli, Sicily,<br>37°17' N 15°09'<br>E. Mission Sicile<br>Orientale, 1990.<br>Sta. 0118 | 20, algae, stones<br>and<br><i>Lithothamnium</i><br>gravel. |                                     |
| 4 shs., SMNH 19110            | Baie de Brucoli,<br>Sicily, 37° 16' N<br>15°11' E. Mission<br>Sicile Orientale,<br>1990. Sta. 0110             | Seagrass beds                                               |                                     |
| 18 (8 P) shs, coll. Garilli   | Torre Vendicari,<br>Sicily                                                                                     | 0.2–0.6 on<br>photophilous<br>algae                         |                                     |
| 6 P, coll. Garilli            | Case Buffa,<br>Vittoria, Ragusa,<br>Sicily                                                                     | Sheltered,<br>possibly lagoon<br>environment                | Early<br>Pleistocene<br>(Calabrian) |
| 66 (8 P) shs, coll. Garilli   | Bovetto, Reggio<br>Calabria, Italy                                                                             | Infra-circalittoral                                         | Late Pleistocene                    |
| 15 shs, coll. Garilli         | Alexandroupoli,<br>Greece                                                                                      | Beached shell                                               |                                     |
| 1 sh., MNHN coll. Vignal      | Isle of Crete,<br>Greece                                                                                       | -                                                           |                                     |

|                                                  |                                                     |                                 |                      |
|--------------------------------------------------|-----------------------------------------------------|---------------------------------|----------------------|
| 23 P, MNHN                                       | Isle of Spetses,<br>Greece                          | Beached shells                  |                      |
| 56 shs (50 P), MNHN                              | Marathon, Greece                                    | Infralittoral                   |                      |
| 6 shs (4 P), MNHN                                | Cape Sounion,<br>Greece                             | 23                              |                      |
| 3 shs, SMNH 36315, Passler.<br>Ex coll. Schlesch | Isle of Poros,<br>Greece                            | -                               |                      |
| 22 shs, MNHN coll. Garilli                       | Harbour of<br>Pythagorion, Isle<br>of Samos, Greece | 1–4 on<br>photophilous<br>algae |                      |
| 3 shs, MNHN coll. Vignal                         | Gulf of Smirne,<br>Turkey                           | -                               |                      |
| 4 shs., MNHN coll. D'Orbigny -<br>B41319         | Rhodes Island                                       | -                               | Early<br>Pleistocene |
| 1 sh., coll. Spada                               | Coral Bay, Pafos,<br>Isle of Cyprus                 | 1–4                             |                      |

---
